1 **Title: Orthogonal genome-wide screenings in bat cells identify MTHFD1 as a target of**  
2 **broad antiviral therapy**

3  
4 **Authors:**

5 Danielle E Anderson<sup>1\*</sup>, Jin Cui<sup>2\*</sup>, Qian Ye<sup>2\*</sup>, Baoying Huang<sup>3\*</sup>, Wenhong Zu<sup>2</sup>, Jing Gong<sup>2</sup>,  
6 Weiqiang Liu<sup>4</sup>, So Young Kim<sup>5</sup>, Biao Guo Yan<sup>1</sup>, Kristmundur Sigmundsson<sup>1</sup>, Xiao Fang Lim<sup>1</sup>,  
7 Fei Ye<sup>3</sup>, Peihua Niu<sup>3</sup>, Xuming Zhou<sup>4</sup>, Wenjie Tan<sup>3</sup>, Lin-Fa Wang<sup>1#</sup> & Xu Tan<sup>2#</sup>

- 8  
9 1. Programme in Emerging Infectious Diseases, Duke–NUS Medical School, Singapore,  
10 Singapore.  
11 2. MOE Key Laboratory of Bioorganic Phosphorus Chemistry & Chemical Biology, Beijing  
12 Advanced Innovation Center for Structural Biology, School of Pharmaceutical Sciences,  
13 Tsinghua-Peking Center for Life Sciences, Center for Infectious Disease Research, School of  
14 Medicine, Tsinghua University, Beijing, China.  
15 3. NHC Key Laboratory of Biosafety, Ministry of Health, National Institute for Viral Disease  
16 Control and Prevention, China CDC, Beijing, China  
17 4. Institute of Zoology, Chinese Academy of Science, Beijing, China  
18 5. Department of Molecular Genetics and Microbiology, Duke University, Durham, North  
19 Carolina, 27708, USA

20 \*: These authors contributed equally to the work.

21 #: To whom correspondence should be addressed: Xu Tan ([xutan@tsinghua.edu.cn](mailto:xutan@tsinghua.edu.cn)) or Lin-fa  
22 Wang ([linfa.wang@duke-nus.edu.sg](mailto:linfa.wang@duke-nus.edu.sg))

23  
24  
25  
26  
27  
28  
29  
30  
31

1 **SUMMARY:**

2 Bats are responsible for the zoonotic transmission of several major viral diseases including the  
3 2003 SARS outbreak and the ongoing COVID-19 pandemic. While bat genomic sequencing  
4 studies have revealed characteristic adaptations of the innate immune system, functional genomic  
5 studies are urgently needed to provide a foundation for the molecular dissection of the tolerance  
6 of viral infections in bats. Here we report the establishment and screening of genome-wide RNAi  
7 library and CRISPR library for the model megabat, *Pteropus Alecto*. We used the complementary  
8 RNAi and CRISPR libraries to interrogate *Pteropus Alecto* cells for infection with two different  
9 viruses, mumps virus and Influenza A virus, respectively. Screening results converged on the  
10 endocytosis pathway and the protein secretory pathway as required for both viral infections.  
11 Additionally, we revealed a general dependence of the C-1-tetrahydrofolate synthase gene,  
12 MTHFD1, for viral replication in bat cells as well as in human cells. MTHFD1 inhibitor carolacton  
13 potently blocked replication of several RNA viruses including SARS-CoV-2. Our studies provide  
14 a resource for systematic inquiry into the genetic underpinnings of bat biology and a potential  
15 target for developing broad spectrum antiviral therapy.

16

17

18 As the only mammal capable of sustained flying, bats are intriguing animals with unique  
19 behavioral and physiological characteristics. Bats are notorious for transmission of deadly  
20 viruses, causing the epidemics of the Ebola<sup>1</sup>, SARS<sup>2</sup>, Henipavirus<sup>3</sup>, MERS<sup>4</sup> and COVID-19<sup>5,6</sup>.  
21 Bats are widely considered the largest reservoir of numerous virus species but are resilient to the  
22 diseases associated with many of these viruses<sup>7,8</sup>. How bats tolerate the infections with these  
23 viruses is of intense interest due to the scientific and public health relevance. Genomic  
24 sequencing studies have revealed several genetic adaptations underlying this tolerance of viral  
25 infections. For example, the DNA damage checkpoint pathway and the NF- $\kappa$ B pathway are  
26 known to be positively selected in the bat genomes<sup>9</sup>. In addition, in the type I interferon gene  
27 family, the MHC class I genes and natural killer cell receptor family have been reported to be  
28 highly expanded in the bat genomes<sup>10</sup>. These studies provided evidence to support the hypothesis  
29 that bats have evolved a highly specific genetic configuration, especially in the innate immunity  
30 pathways. A major caveat is the lack of systematic examination of the functions of these genes  
31 due to shortage of functional genomic tools.

1 CRISPR and RNAi technologies have enabled genome-wide screening of gene functions for a  
2 variety of cell types, yielding an unprecedented wealth of information revealing the complexity of  
3 biological processes<sup>11,12</sup>. This is especially true in the field of virus-host interactions, where a  
4 plethora of host factors have been identified for a variety of viruses<sup>13-15</sup>. Both technologies have  
5 advantages and disadvantages and provide complementary approaches to achieve comprehensive  
6 genetic perturbations<sup>16-18</sup>. CRISPR permits complete knockout of a gene, thus affords generation  
7 of truly null genotype. A caveat is that the lethality associated with knockout of essential genes  
8 prevents functional parsing of these genes in different biological processes. In addition, CRISPR  
9 screening is usually used a pool-based format that requires the generation of stable cell lines  
10 through long term culturing. Therefore, CRISPR is suited for studying phenotypes that require a  
11 longer time to manifest. Based on previous studies, CRISPR screens demonstrated excellent  
12 specificity but limited sensitivity<sup>17</sup>. In contrast, siRNA screening relies on temporary knockdown  
13 of genes in an individual well format, a methodology suited for examining short-term phenotypic  
14 changes. Due to the transient nature of the assay, siRNA screening can tolerate growth defects due  
15 to gene knockdown and can elucidate hypomorphic phenotypes induced by siRNAs with varying  
16 degrees of knockdown. In general, RNAi screens allow comprehensive identification of genes in  
17 a biological process at the cost of more false positives due to pervasive off-target effects<sup>17</sup>. To fully  
18 realize the power of CRISPR and RNAi screening as complementary strategies to interrogate gene  
19 function in bats, here we developed a pool-based CRISPR library and a plate-based siRNA library  
20 for the whole genome of the model megabat *Pteropus Alecto*. We screened two viruses, influenza  
21 A virus and mumps virus, using the CRISPR and RNAi libraries, respectively, in the hope of  
22 uncovering common host factors for different viruses. From these two screens, common pathways  
23 such as the endocytosis pathway and protein secretory pathway have been identified,  
24 demonstrating conserved pathways between bat and other mammals in hosting viral infections.  
25 We extensively characterized a common hit from the two screens, MTHFD1, and identified it as a  
26 critical factor for viral replication in both bats and humans. We further demonstrate that MTHFD1  
27 is a potential target for developing broad-spectrum antiviral drugs. MTHFD1 inhibitor carolacton  
28 demonstrated broad antiviral activities against Zika virus, mumps virus, and importantly, SARS-  
29 CoV-2. In summary, we developed two orthogonal libraries for genome-wide loss-of-function  
30 screening in bats and demonstrated their utility in discovery of important host factors for viral  
31 infections.

## 1 **Design and validation of genome-wide CRISPR of *P. Alecto***

2 We designed and synthesized the CRISPR and RNAi libraries based on the genome of *P. alecto*.  
3 For the CRISPR library, we adopted the algorithm developed for the construction of the popular  
4 GeCKO library to select single guide RNAs (sgRNAs)<sup>19</sup>. We designed 85,275 sgRNAs targeting  
5 21,334 genes annotated in the *P. alecto* genome with 21,330 genes with 4 sgRNAs for each gene.  
6 The other 34 genes have 1-3 sgRNAs due to the constraints of the gene sequences for designing  
7 sgRNAs. Selection of sgRNAs was based on the calculations of off-target scores to lower potential  
8 off-target effects of the sgRNAs. The sgRNAs designs were validated for 21 sgRNAs targeting 11  
9 genes using T7E1 endonuclease cleavage assay or Western blotting. We observed 90.5% of  
10 effectiveness in gene editing or gene knockdown, supporting the quality of the designed library  
11 (**Supplementary Figure 1**).

12

## 13 **CRISPR screening identified influenza A virus host factors**

14 We performed a CRISPR screen with influenza A virus in PaKi cells to identify viral host factors  
15 (**Fig. 1a**). PaKi cells stably expressing SgCas9 and sgRNA library were infected with the H1N1  
16 PR8 strain of influenza A virus, in duplicate. We used a high multiplicity-of-infection (MOI) so  
17 that naïve PaKi cells all died before the 9th day post infection. We then collected the surviving  
18 cells and compared sgRNA abundance with mock-infected cells. The two replicates demonstrated  
19 a high correlation, indicating high reproducibility (**Supplementary Fig. 2**). We calculated the  
20 results using the RIGER algorithm and identified 21 host factors required for the viral infection or  
21 pathogenesis<sup>20</sup> (**Fig. 1b**). Three of the top four hits belong to the V-type proton ATPase subunits  
22 (ATP6V1B2, ATP6V1F and ATP6V0D1), which are involved in the acidification of endosome  
23 and have previously been identified as key host factors for influenza virus entry in several  
24 screens performed in human cells (**Fig. 1b**)<sup>21</sup>. Among the other hits were two genes, COPZ1 and  
25 SEC23B, involved in the protein secretory pathway, which are also known to be required for the  
26 replication of many viruses including influenza virus and flavivirus (**Fig. 1b**)<sup>21-23</sup>. The enrichment  
27 of previously known host factors in the identified hits in the CRISPR screen validated our library  
28 and the screening methodology.

29

## 30 **RNAi screen results converge with CRISPR screening on key pathways**

1 We synthesized the sgRNA library in an array-based oligonucleotide library and cloned them into  
2 the lentiGuide-Puro lentivirus expression vector<sup>24</sup>. A custom bat siRNA library was designed to  
3 target 18,328 genes using 40,016 siRNA duplexes. We performed RNAi screening in PaKi cells  
4 for identification of host factors for the infection of mumps virus, a paramyxovirus (**Fig. 1c**). The  
5 screen was performed in 384-well format with a mumps virus strain expressing EGFP from an  
6 additional open reading frame<sup>25</sup>. PaKi cells were infected 48 hours after transfection of the siRNA  
7 library. High-content imaging analysis was utilized to quantitate the infection rate as well as the  
8 total cell number each well, indicating cytotoxicity of the siRNA. Excluding siRNAs with  
9 significant cytotoxicity, we selected 45 host dependency factors whose knockdown resulted in  
10 significantly reduced viral infection and 45 host restriction factors whose knockdown promoted  
11 viral infection based on the Z score of infection rate (**Fig. 1d**). We selected a number of genes for  
12 individual validation with more replicates and obtained a high validation rate (11/12 of host  
13 dependency factors and 7/12 of the host restriction factors validated with at least one siRNA)  
14 (**Supplementary Fig. 3**), supporting the reproducibility of our screening methodology.

15  
16 Although there is only one gene overlap between the host factors identified in both CRISPR  
17 and RNAi screens, we observed that the endocytosis pathway and protein secretory pathway were  
18 enriched in both screens, albeit represented by different genes (**Fig. 1b and 1d**). For the  
19 endocytosis pathway, two genes encoding components of clathrin complex, CLTA and CLTC,  
20 were among the top three hits (**Fig. 1d**). Four genes involved in the protein secretory, namely  
21 ARF1, ARF4, COPG1 and SEC61B, were identified (**Fig. 1d**). This is consistent with the idea that  
22 both influenza A virus and mumps require the two pathways for viral replication. In addition,  
23 protein translation initiation, which was previously reported to be required for influenza A  
24 infection<sup>21</sup>, was also represented in the top hits by three genes: EIF3B, EIF3G and EIF4A3.  
25 Conversely, RNAi screening revealed genes that restrict mumps infection in PaKi cells. Among  
26 the top hits were several known antiviral genes, TRIM39, TRIM43<sup>26</sup> and NAMPT<sup>27</sup>. Overall, we  
27 identified many candidate genes that might play a role in viral infection in bats.

28  
29 The two pathways identified by both CRISPR screen and siRNA screen, endocytosis and  
30 protein secretion, have previously been implicated in human host response to a number of viral  
31 pathogens<sup>13,21,23</sup>. To validate the role of these pathways in the bat response to viral infection, we

1 established PaKi stable cell lines expressing shRNAs targeting several hits from the two screens.  
2 Stable knockdown of a V-type proton ATPase subunit and SEC23B led to a significant decrease  
3 of influenza A virus infection in PaKi cells (**Fig. 1e and 1f**). In addition, the small molecule  
4 inhibitor of V-type proton ATPase, bafilomycin A (**Fig. 1g**), potently blocked influenza infection.  
5 Taken together, these results demonstrate that bat and human cells share key genes and pathways  
6 in hosting viral infection.

7

### 8 **MTHFD1 is a key host factor for a broad spectrum of RNA viruses**

9 The gene identified as a host factor from both the CRISPR and RNAi screen was MTHFD1 (**Fig.**  
10 **1c and 1d**), which we validated by siRNA knockdown in the context of mumps infection  
11 (**Supplemental Fig. 3**). We validated its function in influenza A virus replication in PaKi cells  
12 with two different sgRNAs targeting MTHFD1 (**Fig. 2a-2b**). Similarly, in HEK293T cells with  
13 MTHFD1 knocked out by two sgRNAs, influenza replication is also inhibited, suggesting a  
14 conserved requirement for this gene by influenza virus in human cells (**Fig. 2c**). Further virus  
15 titration assay demonstrated that MTHFD1 knockdown significantly inhibits viral replication for  
16 mumps virus in PaKi cells (**Fig. 2d and 2e**). The effect is similar to the knockdown of SEC61B, a  
17 well-studied host protein required for viral replication and a top hit in our RNAi screen (**Fig. 2d**  
18 **and 2e**)<sup>23</sup>. We additionally tested Melaka virus (PRV3M), a pteropine orthoreovirus that causes  
19 acute respiratory disease when transmitted by bats to humans<sup>28</sup>. PRV3M titer was also significantly  
20 reduced by MTHFD1 knockdown (**Fig. 2e and 2f**). Infection of Zika virus, a member of the  
21 flavivirus family, was also inhibited by MTHFD1 knockdown using siRNA (**Fig. 2g**). Alternative  
22 knockdown with stable expression of two shRNAs validated the requirement of MTHFD1 for the  
23 replication of mumps virus and Zika virus (**Fig. 2h, 2i and 2j**). Importantly, we also show that this  
24 inhibition is completely rescued by overexpression of MTHFD1 from a construct resistant to the  
25 shRNA, ruling out potential off-target effects (**Fig. 2k**).

26

### 27 **MTHFD1's formyl tetrahydrofolate synthetase activity is essential for RNA virus replication**

28 MTHFD1 is a trifunctional enzyme involved in the one carbon (C1) metabolism pathway, which  
29 is responsible for cellular production of purine, dTMP and methyl groups<sup>29</sup>. MTHFD1 has three  
30 enzymatic functions including dehydrogenase and cyclohydrolase activities encoded in the N-  
31 terminal domain and formyl tetrahydrofolate (Formyl THF) synthetase activity encoded in the C-

1 terminal domain (**Fig. 3a and 3b**). We suspected that MTHFD1 knockdown would lead to the  
2 deficiency of cellular purine levels thereby reducing RNA replication. Indeed, supplementation of  
3 purine analogs, either hypoxanthine or inosine in the media almost completely rescued the  
4 replication of influenza A and Zika viruses in MTHFD1- knockout or knockdown PaKi cells as  
5 shown by both immunofluorescence staining and virus titrating assay (**Fig. 3c, 3d and 3e**). In  
6 contrast, supplementation of methyl-group donor or thymidine had little effect on viral replication,  
7 evidence that it is the purine synthesis activity of MTHFD1 that is essential for the viral replication  
8 (**Fig. 3d**). To further pinpoint the enzymatic function of MTHFD1 in viral replication, we  
9 performed gene complementation experiments in an shRNA cell line with over 90% knockdown  
10 of MTHFD1 (**Fig. 2i**). The block of Zika virus replication in this cell line was completely rescued  
11 by overexpression of an shRNA-resistant MTHFD1 construct or bat homolog (**Fig. 3f and 3g**).  
12 Mutations of MTHFD1 that are known to disrupt its dehydrogenase and cyclohydrolase activities  
13 (D125A and R173C)<sup>30,31</sup> did not affect this rescue (**Fig. 3b, 3f and 3g**). However, mutations in the  
14 Formyl THF synthetase active site (F759A/W788A, or FW/AA)<sup>32</sup> completely abolished this rescue,  
15 further supporting that the purine synthesis activity of MTHFD1 is an essential activity for viral  
16 replication (**Fig. 3b, 3f and 3g**).  
17

18 We observed a similar dependence on MTHFD1 function for influenza A virus infection in  
19 HEK293T cells, a human kidney epithelial cell line (**Fig. 3h**). Time course experiments  
20 demonstrated a viral replication following MTHFD1 knockdown steadily decreased from four  
21 hours post-infection with influenza A virus, consistent with a RNA replication defect (**Fig. 3i**).  
22 This defect in replication was completely rescued by supplementing purine analog inosine in the  
23 media, supporting a conserved function of MTHFD1 in viral infection in bats and humans (**Fig.**  
24 **3h and 3j, Supplementary Fig. 4**).  
25

### 26 **MTHFD1 inhibitor carolacton inhibits RNA virus replication**

27 Carolacton, a natural product derived from bacteria, has recently been identified as a potent  
28 inhibitor of MTHFD1<sup>33</sup>. We tested the effect of this compound on viral replication. Carolacton  
29 inhibited Zika virus and mumps virus replication in PaKi cells in a dose dependent fashion (**Fig.**  
30 **4a, 4b and 4c**). The inhibition was achieved at doses with little cytotoxicity (**Fig. 4a**).  
31 Mechanistically, this inhibition was completely rescued by supplementation of inosine, providing

1 support that carolacton indeed exerts antiviral activities by inhibiting MTHFD1 (**Fig. 4b and 4c**).  
2 We next tested the effect of carolacton on the infection of SARS-CoV-2. The viral infection in  
3 Vero E6 cells was effectively inhibited at sub-micromolar concentrations by carolacton ( $IC_{50}=0.14$   
4  $\mu M$ ) (**Fig. 4d**). The cytotoxic effect is very moderate in comparison (**Fig. 4d**), supporting a  
5 therapeutic window of this compound in potential clinical applications.

6

## 7 **Discussion**

8 We developed the first bat genome-wide RNAi and CRISPR libraries and performed two screens  
9 with two different RNA viruses. Although the screening methodologies are quite different, we  
10 uncovered similar pathways essential for viral replication, namely the endocytosis pathway and  
11 protein secretory pathways. The different genes in these two pathways identified from the screens  
12 reflect the complementarity of the methodologies, with RNAi screening useful for observing acute  
13 effects on viral infection and CRISPR screening for long-term effects on cell survival. Other than  
14 technical differences between screening methods, viral kinetics, sensitivity of the viruses to loss-  
15 of-function of genes, differences in genome coverage within the two libraries likely contributed to  
16 the different hits observed in our studies. Both libraries provide valuable and complementary  
17 sources that meet the urgent need to address the biological questions of bats. Similar to human  
18 genomic libraries, the utility of these bat libraries in screening different cell types of bats,  
19 especially those of the immune systems, would unveil more secrets of this enigmatic species.

20

21 Both screens identified MTHFD1 as an essential viral host factor. MTHFD1 is a key enzyme  
22 in the C1 metabolism responsible for production of purine, dTMP and methyl group, the first two  
23 of which are building blocks for DNA and RNA synthesis. Interestingly, all previous RNAi and  
24 CRISPR screens using human cells have not identified MTHFD1 as a host factor. Moreover, we  
25 found bats cells and tissues have lower MTHFD1 expression levels than their human counterparts  
26 (**Supplementary Fig. 5a, 5b and 5c**). This might be related to the difference in the promoter  
27 regions between bats and humans, notably a lack of CCAAT box<sup>34</sup> in the promoter of two bat  
28 species (**Supplementary Fig. 5d**). We show that MTHFD1 knockdown blocks replication of  
29 multiple RNA viruses, including influenza virus, mumps virus, Melaka virus and Zika virus.  
30 Importantly, host cells have a higher tolerance for MTHFD1 inhibition than viruses, potentially  
31 providing a therapeutic window for targeting MTHFD1 with antiviral drugs. Virus infection



1 converts the whole cellular machinery into a factory to massively produce progeny viruses, which  
2 explains the vital dependence on MTHFD1. This is analogous to cancer cell's addiction to non-  
3 oncogenic gene functions such as many metabolic enzymes<sup>35</sup>. Similar to the therapeutic targeting  
4 of these non-oncogenic addictions for developing cancer drugs, these viral addictions to metabolic  
5 enzymes such as MTHFD1 could open doors to many new opportunities for developing broad-  
6 spectrum antiviral drugs<sup>36</sup>. These drugs could be readily applied in emerging epidemics, as  
7 demonstrated by our evidence here that MTHFD1 inhibitor carolacton can suppress the infection  
8 of SARS-CoV-2. We envision the functional genomics tools we provided here will be instrumental  
9 to further discoveries by better understanding the bat-virus interaction.

10

## 11 Reference

- 12 1 Leroy, E. M. *et al.* Fruit bats as reservoirs of Ebola virus. *Nature* **438**, 575-576,  
13 doi:10.1038/438575a (2005).
- 14 2 Li, W. *et al.* Bats are natural reservoirs of SARS-like coronaviruses. *Science* **310**, 676-679,  
15 doi:10.1126/science.1118391 (2005).
- 16 3 Clayton, B. A., Wang, L. F. & Marsh, G. A. Henipaviruses: an updated review focusing on  
17 the pteropid reservoir and features of transmission. *Zoonoses Public Health* **60**, 69-83,  
18 doi:10.1111/j.1863-2378.2012.01501.x (2013).
- 19 4 Mohd, H. A., Al-Tawfiq, J. A. & Memish, Z. A. Middle East Respiratory Syndrome  
20 Coronavirus (MERS-CoV) origin and animal reservoir. *Virol J* **13**, 87,  
21 doi:10.1186/s12985-016-0544-0 (2016).
- 22 5 Wu, F. *et al.* A new coronavirus associated with human respiratory disease in China.  
23 *Nature*, doi:10.1038/s41586-020-2008-3 (2020).
- 24 6 Zhou, P. *et al.* A pneumonia outbreak associated with a new coronavirus of probable bat  
25 origin. *Nature*, doi:10.1038/s41586-020-2012-7 (2020).
- 26 7 Olival, K. J. *et al.* Host and viral traits predict zoonotic spillover from mammals. *Nature*  
27 **546**, 646-650, doi:10.1038/nature22975 (2017).
- 28 8 Wang, L. F. & Anderson, D. E. Viruses in bats and potential spillover to animals and  
29 humans. *Curr Opin Virol* **34**, 79-89, doi:10.1016/j.coviro.2018.12.007 (2019).
- 30 9 Zhang, G. *et al.* Comparative analysis of bat genomes provides insight into the evolution  
31 of flight and immunity. *Science* **339**, 456-460, doi:10.1126/science.1230835 (2013).
- 32 10 Pavlovich, S. S. *et al.* The Egyptian Rousette Genome Reveals Unexpected Features of Bat  
33 Antiviral Immunity. *Cell* **173**, 1098-1110 e1018, doi:10.1016/j.cell.2018.03.070 (2018).
- 34 11 Mohr, S., Bakal, C. & Perrimon, N. Genomic screening with RNAi: results and challenges.  
35 *Annu Rev Biochem* **79**, 37-64, doi:10.1146/annurev-biochem-060408-092949 (2010).
- 36 12 Shalem, O., Sanjana, N. E. & Zhang, F. High-throughput functional genomics using  
37 CRISPR-Cas9. *Nat Rev Genet* **16**, 299-311, doi:10.1038/nrg3899 (2015).
- 38 13 McDougall, W. M., Perreira, J. M., Reynolds, E. C. & Brass, A. L. CRISPR genetic screens  
39 to discover host-virus interactions. *Curr Opin Virol* **29**, 87-100,  
40 doi:10.1016/j.coviro.2018.03.007 (2018).

- 1 14 Panda, D. & Cherry, S. Cell-based genomic screening: elucidating virus-host interactions.  
2 *Curr Opin Virol* **2**, 784-792, doi:10.1016/j.coviro.2012.10.007 (2012).
- 3 15 Puschnik, A. S., Majzoub, K., Ooi, Y. S. & Carette, J. E. A CRISPR toolbox to study virus-  
4 host interactions. *Nat Rev Microbiol* **15**, 351-364, doi:10.1038/nrmicro.2017.29 (2017).
- 5 16 Schuster, A. *et al.* RNAi/CRISPR Screens: from a Pool to a Valid Hit. *Trends Biotechnol*  
6 **37**, 38-55, doi:10.1016/j.tibtech.2018.08.002 (2019).
- 7 17 Perreira, J. M., Meraner, P. & Brass, A. L. Functional Genomic Strategies for Elucidating  
8 Human-Virus Interactions: Will CRISPR Knockout RNAi and Haploid Cells? *Adv Virus*  
9 *Res* **94**, 1-51, doi:10.1016/bs.aivir.2015.11.001 (2016).
- 10 18 Taylor, J. & Woodcock, S. A Perspective on the Future of High-Throughput RNAi  
11 Screening: Will CRISPR Cut Out the Competition or Can RNAi Help Guide the Way? *J*  
12 *Biomol Screen* **20**, 1040-1051, doi:10.1177/1087057115590069 (2015).
- 13 19 Shalem, O. *et al.* Genome-scale CRISPR-Cas9 knockout screening in human cells. *Science*  
14 **343**, 84-87, doi:10.1126/science.1247005 (2014).
- 15 20 Luo, B. *et al.* Highly parallel identification of essential genes in cancer cells. *Proc Natl*  
16 *Acad Sci U S A* **105**, 20380-20385, doi:10.1073/pnas.0810485105 (2008).
- 17 21 Watanabe, T., Watanabe, S. & Kawaoka, Y. Cellular networks involved in the influenza  
18 virus life cycle. *Cell Host Microbe* **7**, 427-439, doi:10.1016/j.chom.2010.05.008 (2010).
- 19 22 Zhu, P. *et al.* Host Cellular Protein TRAPPC6ADelta Interacts with Influenza A Virus M2  
20 Protein and Regulates Viral Propagation by Modulating M2 Trafficking. *J Virol* **91**,  
21 doi:10.1128/JVI.01757-16 (2017).
- 22 23 Shah, P. S. *et al.* Comparative Flavivirus-Host Protein Interaction Mapping Reveals  
23 Mechanisms of Dengue and Zika Virus Pathogenesis. *Cell* **175**, 1931-1945 e1918,  
24 doi:10.1016/j.cell.2018.11.028 (2018).
- 25 24 Sanjana, N. E., Shalem, O. & Zhang, F. Improved vectors and genome-wide libraries for  
26 CRISPR screening. *Nat Methods* **11**, 783-784, doi:10.1038/nmeth.3047 (2014).
- 27 25 Anderson, D. E. *et al.* Comparative Loss-of-Function Screens Reveal ABCE1 as an  
28 Essential Cellular Host Factor for Efficient Translation of Paramyxoviridae and  
29 Pneumoviridae. *mBio* **10**, doi:10.1128/mBio.00826-19 (2019).
- 30 26 van Gent, M., Sparrer, K. M. J. & Gack, M. U. TRIM Proteins and Their Roles in Antiviral  
31 Host Defenses. *Annu Rev Virol* **5**, 385-405, doi:10.1146/annurev-virology-092917-043323  
32 (2018).
- 33 27 Schoggins, J. W. *et al.* A diverse range of gene products are effectors of the type I interferon  
34 antiviral response. *Nature* **472**, 481-485, doi:10.1038/nature09907 (2011).
- 35 28 Chua, K. B. *et al.* A previously unknown reovirus of bat origin is associated with an acute  
36 respiratory disease in humans. *Proc Natl Acad Sci U S A* **104**, 11424-11429,  
37 doi:10.1073/pnas.0701372104 (2007).
- 38 29 Ducker, G. S. & Rabinowitz, J. D. One-Carbon Metabolism in Health and Disease. *Cell*  
39 *Metab* **25**, 27-42, doi:10.1016/j.cmet.2016.08.009 (2017).
- 40 30 Field, M. S., Kamynina, E., Watkins, D., Rosenblatt, D. S. & Stover, P. J. Human mutations  
41 in methylenetetrahydrofolate dehydrogenase 1 impair nuclear de novo thymidylate  
42 biosynthesis. *Proc Natl Acad Sci U S A* **112**, 400-405, doi:10.1073/pnas.1414555112  
43 (2015).
- 44 31 Sundararajan, S. & MacKenzie, R. E. Residues involved in the mechanism of the  
45 bifunctional methylenetetrahydrofolate dehydrogenase-cyclohydrolase: the roles of

- 1 glutamine 100 and aspartate 125. *J Biol Chem* **277**, 18703-18709,  
2 doi:10.1074/jbc.M200127200 (2002).
- 3 32 Celeste, L. R. *et al.* Mechanism of N10-formyltetrahydrofolate synthetase derived from  
4 complexes with intermediates and inhibitors. *Protein Sci* **21**, 219-228,  
5 doi:10.1002/pro.2005 (2012).
- 6 33 Fu, C. *et al.* The natural product carolacton inhibits folate-dependent C1 metabolism by  
7 targeting FolD/MTHFD. *Nat Commun* **8**, 1529, doi:10.1038/s41467-017-01671-5 (2017).
- 8 34 Martyn, G. E., Quinlan, K. G. R. & Crossley, M. The regulation of human globin promoters  
9 by CCAAT box elements and the recruitment of NF-Y. *Biochim Biophys Acta Gene Regul*  
10 *Mech* **1860**, 525-536, doi:10.1016/j.bbagr.2016.10.002 (2017).
- 11 35 Luo, J., Solimini, N. L. & Elledge, S. J. Principles of cancer therapy: oncogene and non-  
12 oncogene addiction. *Cell* **136**, 823-837, doi:10.1016/j.cell.2009.02.024 (2009).
- 13 36 Deans, R. M. *et al.* Parallel shRNA and CRISPR-Cas9 screens enable antiviral drug target  
14 identification. *Nat Chem Biol* **12**, 361-366, doi:10.1038/nchembio.2050 (2016).

15

#### 16 **Author contributions:**

17 XT, DEA and L-FW conceived and guided the study. DEA performed and analyzed RNAi screen  
18 and RNAi hit validation with assistance from SYK, BGY, KS and XFL. JC and QY performed  
19 CRISPR screen and hits validation. JC performed most experiments on MTHFD1. BH performed  
20 SARS-CoV-2 infection assay with help from FY and PFY and under the guidance of WT. WZ, JG,  
21 WL and XZ performed bioinformatics analysis of the study. XT wrote the manuscript with input  
22 from all authors.

23

#### 24 **Acknowledgements:**

25 We thank Fu Chengzhang and Rolf Müller for providing carolacton. We thank Jianzhong Xi for  
26 oligonucleotide synthesis. XT is supported by the the China National Funds for Excellent Young  
27 Scientists (31722030) and was supported by the Beijing Advanced Innovation Center for  
28 Structural Biology and the Tsinghua-Peking Joint Center for Life Sciences. DEA and L-FW are  
29 supported by grants NRF2012NRF-CRP001-056 and NRF2016NRF-NSFC002-013 from the  
30 Singapore National Research Foundation and National Medical Research Council Cooperative  
31 Basic Research Grant NMRC/BNIG/2030/2015.

32

33

34

#### 35 **Figure legends:**

1 **Figure 1. Work flows and results of CRISPR and RNAi screens in PaKi cells.** **a.** For CRISPR  
2 Cas9 knock out screen, PaKi cells stably expressing Cas9 were transduced with lentiviral sgRNA  
3 library targeting 21300 genes of *P. alecto*. The transduced cells were selected with puromycin to  
4 generate the sgRNA cell library. Then the library cells were infected with influenza A virus (IAV)  
5 PR8 strain (A/PuertoRico/8/1934) at lethal dose or mock infected. The surviving cells were  
6 subjected to two more rounds of infection. The surviving cells at day 9 post-infection were  
7 harvested and the genomic DNA were prepared and amplified for the sgRNA region for deep  
8 sequencing. **b.** The sgRNA abundance from sequencing was analyzed by RIGER algorithm, the  
9 top hits representing host factors required for cell deaths from influenza infection were labeled. **c.**  
10 For siRNA screen, siRNAs targeting 18328 genes of *P. alecto* were arrayed in the 96-well plates.  
11 The siRNAs were reverse transfected into PaKi cells and 48 h after transfection, the cells were  
12 infected with mumps virus. The percentage of infected cells was calculated at 48 h post infection  
13 using high content imaging. **d.** The siRNA targeted genes were ranked by robust Z score, and the  
14 potential host factors or restriction factors were shown in the bottom or the top, respectively. **e.**  
15 PaKi cells expressing an shRNA targeting ATP6V0D1 or a non-targeting control shRNA were  
16 infected with IAV and the virus infection rate was measured by immunofluorescence using the  
17 hemagglutinin antibody at 12h post infection (left). The shRNA knockdown efficiency was  
18 detected by real-time PCR (right). For immunofluorescence experiments, n=3, and for real-time  
19 PCR data, n=2. Data shown as mean  $\pm$  standard deviation. **f.** PaKi cells expressing an shRNA  
20 targeting SEC23B or a non-targeting control shRNA were infected with IAV PR8 and the virus  
21 infection rate was measured by immunofluorescence using the hemagglutinin antibody at 12h post  
22 infection (left). The shRNA knockdown efficiency was detected by real-time PCR (right). For  
23 immunofluorescence experiments, n=3, and for real-time PCR data, n=2. Data shown as mean  $\pm$   
24 standard deviation. **g.** PaKi cells were treated with indicated doses of V-ATPase inhibitor,  
25 bafilomycin A1, and infected with IAV. The infection rate was measured by immunofluorescence  
26 using the hemagglutinin antibody at 12h post infection. Data shown as the mean  $\pm$  standard  
27 deviation (n=3). \*: P<0.05, \*\*: P<0.01, \*\*\*: P<0.001.

28  
29

30 **Figure 2. MTHFD1 is host factor for replication of multiple RNA viruses.** **a.** MTHFD1  
31 knockout clonal PaKi cells were generated from two independent sgRNAs and infected with

1 Influenza A virus (IAV) for 12h. The infection rates were quantified with immunofluorescence  
2 staining of HA. Data shown as the mean  $\pm$  standard deviation (n=3). **b.** Representative images  
3 from **a.** (scale bar=100  $\mu$ m). **c.** MTHFD1 knock out 293T cells were generated from two  
4 independent sgRNAs and infected with IAV for another 12h. Then the cells were collected and  
5 analyzed by Western blotting. Data shown are representative of three independent experiments. **d-**  
6 **f.** PaKi cells were transfected with non-target control siRNA (siNT) or siRNAs targeting MTHFD1  
7 and SEC61B followed by mumps virus(**d**) and Melaka virus (**f**) infection. The virus in the  
8 supernatant were tittered by limiting dilution. The knockdown efficiency was determined by real-  
9 time PCR and shown in (**e**). For **d** and **e** n=3, and for **f**, n=4. Data shown as the mean  $\pm$  standard  
10 deviation. **g.** PaKi cells were transfected with siNT or siRNA targeting MTHFD1, 48 h later the  
11 cells were infected with Zika virus. The Zika virus RNA level was measured by real-time PCR.  
12 For **g**, n=4. Data shown as the mean  $\pm$  standard deviation. **h-j.** PaKi shRNA control cells (shNT)  
13 and shMTHFD1 cells were infected with mumps virus (**h**) or Zika virus (**i**), the virus infection  
14 level was measured by immunofluorescence. For **h**, n=2 and for **i**, n=3. Data shown as the mean  
15  $\pm$  standard deviation. The shRNA knockdown efficiency was tested by Western blotting as  
16 showing in (**j**). Data shown are representative of three independent experiments. **k.** Luciferase or  
17 shRNA resistant MTHFD1 construct were stably expressed in shMTHFD1-2 PaKi cells, then the  
18 cells were infected with Zika virus. The rescue level of Zika virus was analyzed by Western  
19 blotting. Data shown are representative of three independent experiments. For all bar graphs, the  
20 mean  $\pm$  standard deviation values are shown. \*: P<0.05, \*\*: P<0.01, \*\*\*: P<0.001.

21

22 **Figure 3. MTHFD1's formyl tetrahydrofolate synthetase activity is essential for RNA virus**  
23 **replication, a.** MTHFD1 is a trifunctional enzyme in the one carbon metabolism which is required  
24 for purines, dTMP and methionine synthesis. **b.** Domain structures and key amino acids of  
25 MTHFD1 with key residues for the three enzymatic functions indicated. **c.** PaKi MTHFD1 knock  
26 out cells were infected with IAV with or without supplementation of hypoxanthine or thymidine  
27 for 12 h and the virus infection level was detected by immunofluorescence. Data shown as the  
28 mean  $\pm$  standard deviation (n=3). **d.** PaKi shMTHFD1-2 cells or control cells with a non-targeting  
29 shRNA were infected with Zika virus in regular medium or in medium supplemented with inosine,  
30 thymidine or 5-CH<sub>3</sub>THF. Data shown as the mean  $\pm$  standard deviation (n=3). **e.** PaKi shMTHFD1

1 cells were infected with Zika virus in regular medium or in medium supplemented with inosine.  
2 At 48 h post infection, the virus in the supernatant was harvested and the titre was determined by  
3 limiting dilution in PaKi cells. Data shown as the mean  $\pm$  standard deviation (n=2). **f.** PaKi  
4 shMTHFD1-2 cells or control cells with a non-targeting shRNA were transfected with luciferase  
5 (negative control), human wild type MTHFD1, bat wildtype MTHFD1 or bat MTHFD mutants,  
6 followed by Zika virus infection. The virus infection rate was measured by immunofluorescence.  
7 Data shown as the mean  $\pm$  standard deviation (n=3). **g.** Representative images from **(f)**. Scale bar:  
8 100  $\mu$ m. **h.** HEK293T MTHFD1 knock out cells or control HEK293T cells with a non-targeting  
9 sgRNA (sgNT) were infected with PR8 with or without the supplementation of inosine, thymidine  
10 or 5-CH<sub>3</sub>THF. At 12 h post infection, the cells were collected and analyzed by Western blotting.  
11 Data shown are representative of three independent experiments. **i.** HEK293T MTHFD1 knockout  
12 cells (sgMTHFD1-2) or control cells (sgNT) were infected with IAV. The vRNA level was  
13 determined by real-time PCR at the indicated time points. The results shown representative of  
14 three independent experiments **j.** HEK293T MTHFD1 knockout cells (sgMTHFD1-2) or control  
15 cells (sgNT) were transfected with plasmids expressing the influenza virus mini-genome including  
16 polymerase subunits PB1, PB2 and PA, and nucleoprotein together with pPOLI-HA, which can  
17 transcribe the hemagglutinin vRNA of influenza virus with or without inosine supplementation.  
18 At 16h, 28h, 40h and 52h post transfection, the cells were collected and analyzed by Western  
19 blotting. Data shown are representative of three independent experiments. For all bar graphs, the  
20 mean  $\pm$  standard deviation values are shown. \*P<0.05.

21

22 **Figure 4. MTHFD1 inhibitor carolacton can inhibit a number of RNA viruses including**  
23 **SARS-CoV-2. a.** PaKi cells were treated with different concentrations of carolacton and infected  
24 with mumps virus expressing EGFP or Zika virus. Virus infection level was detected by EGFP or  
25 immunofluorescence staining of Zika E protein. The cell viability was measured by MTT assay.  
26 n=3. Data shown as the mean  $\pm$  standard deviation. **b.** Representative images of  
27 immunofluorescence staining of mumps infection from **(a)**. **c.** PaKi cells were treated with  
28 carolacton and infected with Zika virus in the presence of inosine or mock treated. Representative  
29 images of immunofluorescence staining of Zika virus E protein were shown. Infection rate shown  
30 as the mean  $\pm$  standard deviation (n=3). **d.** PaKi cells were treated with carolacton, and 1h later

1 infected with SARS-CoV-2. At 48 h post infection, the SARS-CoV-2 in the supernatant was  
2 measured by real-time PCR. Data shown as the mean  $\pm$  standard deviation (n=3).

3  
4  
5

## 6 **Methods**

7  
8

### 8 **Cells and virus**

9 PaKi, Vero and 293T cells were cultured in DMEM supplemented with 10% heat inactivated  
10 FBS. Influenza H1N1 PR8 (A/Puerto Rico/8/1934) was propagated in embryonated eggs. Mumps  
11 virus was propagated in PaKi or Vero cells.

12

### 13 **Genome-wide CRISPR-Cas9 knockout screen**

14 Cas9 stably expressed bat kidney derived PaKi cells were transduced with lentivirus of  
15 sgRNA library targeting 21300 genes in the genome of *P. alecto*. The transduced cells were  
16 selected with puromycin to generate the library cells. Then the sgRNA library cells were mock  
17 infected (negative control) or changed with influenza A H1N1 PR8 strain (A/Puerto Rico/8/1934)  
18 at lethal dose. The surviving cells were subjected to two more round infection. The final surviving  
19 cells were applying to deep sequencing. And the sgRNA abundance was analyzed by RIGER  
20 algorithm<sup>1</sup>.

21

### 22 **Deep sequencing data analysis**

23 De-multiplexed reads were trimmed by Cutadapt<sup>2</sup> (version 1.18) using 22 bp flanking  
24 sequences around the guide sequence. Trimmed reads were mapped to the index of bat sgRNA  
25 guide library using Bowtie2<sup>3</sup>. Samtools<sup>4</sup> (version 1.9) was used to process the alignment files to  
26 retain perfectly mapped reads only, and a custom-made Python script was used to count the reads  
27 mapped to each guide. The reads count of guide for each condition were then normalized using  
28 DEseq2. The log<sub>2</sub> ratio of counts between conditions were calculated. The log<sub>2</sub> fold change of  
29 reads count of infected samples to mock infected samples were then used as the input for RIGER  
30 algorithm as previously described (RNAi Gene Enrichment Ranking, GENE-E)<sup>1</sup>. The log-fold-  
31 change metric for ranking sgRNAs and the weighted sum method (weighted sum of first two ranks  
32 of sgRNAs for a gene) with  $1 \times 10^6$  permutations were used to convert individual sgRNA to genes.

1 In the output of RIGER analysis, a given gene was assigned a normalized enrichment score (NES)  
2 to give the ranked gene list. Hits were defined as those owning p-value smaller than 0.001.

3

#### 4 **siRNA screen**

5 For siRNA screen, siRNAs targeting 18,328 genes of *P. alecto* were arrayed in the 96-well  
6 plates. The siRNAs were reverse transfected into PaKi cells, 48 h later, the cells were infected with  
7 mumps virus. The virus infection level was measured at 48 h post infection by high content  
8 imaging (Operetta) as previously described<sup>5</sup>. The siRNA targeted genes were ranked by robust Z  
9 scores<sup>6</sup>, and the potential host factors (Z score < -3) or restriction factors (Z score > 6) were  
10 identified.

11

#### 12 **Validation of sgRNA**

13 Single sgRNA was cloned into lentiGuide-puro and packaged in lentivirus, which was  
14 transduced into Cas9 stably expressing PaKi cells, followed by puromycin and blasticidin selection.  
15 The clonal cells were generated by limiting dilution. The knock out or knock down efficiency was  
16 tested by Western blotting. To facilitate the growth of single clone MTHFD1 knock out cells, the  
17 cells were cultured with HT medium (DMEM supplemented with 10% FBS, 100 $\mu$ M hypoxanthine  
18 and 16 $\mu$ M thymidine). The knock out or knock down efficiency was tested by Western blotting.  
19 Validated knockout cells were applied to virus infection assays. For MTHFD1 knock out cells, the  
20 HT was removed 8h before virus infection.

21

#### 22 **Validation of shRNA**

23 Individual shRNAs were designed using the BLOC-iT<sup>TM</sup> RNAi Designer (Thermo Fisher  
24 Scientific). The specificity was tested by BLAST (NCBI). The shRNA primes were synthesized  
25 as oligos and cloned into PLKO.1.

26 PaKi shMTHFD1-1 forward primer: 5'-ccgg GCACATGGGAATTCCTCTACCctcgag  
27 GGTAGAGGAATTCCCATGTGC tttttg-3'

28 PaKi shMTHFD1-1 reverse primer: 5'-AATTCAAAAA GCACATGGGAATTCCTCTACC  
29 CTCGAG GGTAGAGGAATTCCCATGTGC-3'

30 PaKi shMTHFD1-2 forward primer: 5'- ccgg GCCTGCTGTCACCTTAGGAAATctcgag  
31 ATTCCTAAGTGACAGCAGGC tttttg -3'



1 PaKi shMTHFD1-2 reverse primer: 5'- AATTCAAAAA GCCTGCTGTCAGTTAGGAAAT  
2 CTCGAG ATTCCTAAGTGACAGCAGGC -3'

3

#### 4 **Western blot**

5 Cells were harvested and lysed in RIPA lysis buffer (Beyotime, P0013C) with a cocktail  
6 of protease inhibitors (Biomake, B14001). Samples were applied to 10% or 12% SDS/PAGE  
7 gels(BioRad) and transferred to PVDF membranes (millipore). Membranes were blocked with 5%  
8 nonfat milk in PBS with 0.1% tween 20. Then probed with primary antibodies. The following  
9 antibodies were used in this study: anti-MTHFD1 (Proteintech, 10794-1-AP), anti-beta actin  
10 (Easybio, BE0022), anti PR8 M1 (Genetex, GTX125928-S), anti HA (H1N1) (Genetex,  
11 GTX117951-S), anti-ZIKV NS1 (Genetex, GTX133307), anti flavivirus group antigen antibody  
12 (Millipore, MAB10216). The blots were developed by HRP reaction and imaged with a  
13 ProteinSimple FluorChem imaging system.

14

#### 15 **RNA isolation and real-time PCR**

16 Total RNA from the cells were isolated with a HiPure Total RNA Mini Kit (Magen, R4111-  
17 03). The cDNA was generated by RevertAid RT Reverse Transcription Kit (thermos scientific,  
18 K1691). Influenza vRNA specific primer was used for vRNA transcription. The quantitative real-  
19 time PCR was performed with SYBR Green qPCR master mix (Vazyme, Q311-02) and data were  
20 analyzed by Bio-Rad CFX96 system. The primers for target genes were as follows:

21 Human GAPDH forward primer: 5'- ACAACTTTGGTATCGTGGAAGG-3'

22 Human GAPDH reverse primer: 5'- GCCATCACGCCACAGTTTC-3'

23 P. alecto ACTIN forward primer: 5'- gccagtctacaccgtctgcag -3'

24 P. alecto ACTIN reverse primer: 5'- cgtaggaatccttctggcccatg-3'

25 P. alecto MTHFD1 forward primer: 5'- gggagcgactgaagaaccaag-3'

26 P. alecto MTHFD1 reverse primer: 5'- tcttcagcagccttcagcttcac-3'

27 P. alecto SEC23B forward primer: 5'- cagcgttgaccaggaggcc-3'

28 P. alecto SEC23B reverse primer: 5'- gggtcagatcctgtcgggc -3'

29 P. alecto GAPDH forward primer: 5'- AACTTCTCATGGTTCACAC -3'

30 P. alecto GAPDH reverse primer: 5'- TCATTGACCTCAACTACATG-3'

31 P. alecto ATP6V0D1 forward primer: 5'- GTGGTAGAGTTCCGCCACAT-3'

1 P. alecto ATP6V0D1 reverse primer: 5'- CTCAAAGCTGCCTAGTGGGT-3'

2 PR8 M1 forward primer: 5'- TTCTAACCGAGGTCGAAACGTACG-3'

3 PR8 M1 reserve primer: 5'- ACAAAGCGTCTACGCTGCAG-3'

4 PR8 vRNA reserve transcription primer: 5'-AGCRAAAGCAGG-3'

5 ZIKV NS5 forward primer: 5'- GGTCAGCGTCCTCTCTAATAAACG-3'

6 ZIKV NS5 reserve primer: 5'- GCACCCTAGTGTCCACTTTTTCC-3'

7

## 8 **Immunofluorescence**

9 Virus infected cells were fixed with 4% paraformaldehyde (PFA) for 10min at room  
10 temperature (RT), and permeated with 0.2% Triton X-100 for another 10min at RT, the cells were  
11 washed with PBS for 3 times and incubated with PR8 HA antibody or ZIKV E protein antibody  
12 for 2h at RT or 4°C overnight, then washed with PBS for 3 times and incubated with second  
13 antibody AF488 (goat anti mouse). The nuclei were stained with DAPI. Images were acquired  
14 with Cellomic ArrayScan VTI HCS (Thermo Scientific)

15

## 16 **Virus titration**

17 Approximately  $1 \times 10^4$  PaKi cells were plated into each well of 96-well plates. The  
18 supernatant containing virus harvested from previously infected cell was subjected to ten-fold  
19 serial dilution. Then dilutions were added to the cells and cytopathic effect was observed 96 h after  
20 infection. Titres were determined using standard methodology<sup>7</sup>.

21

## 22 **Influenza virus mini-genome assay**

23 Approximately  $2 \times 10^5$  of 293T control cells or 293T MTHFD1 knock out cells were plated  
24 into each well of 12-well plates and the knockout cells were cultured with HT (100  $\mu$ M  
25 hypoxanthine and 16  $\mu$ M thymidine, Gibco) medium. Then the cells were transfected with the  
26 plasmids expressing viral polymerase subunits PB1, PB2 and PA, and nucleoprotein, together with  
27 pPOLI-HA, transcribing hemagglutinin vRNA segment of A/WSN/33(H1N1) (WSN). At the time  
28 of transfection, HT was removed from the cells and supplied with fresh medium with or without  
29 inosine (100  $\mu$ M). The HA protein level were analyzed at 16 h, 28 h, 40 h and 52 h post transfection  
30 by Western blot.

31

1           **MTT assay**

2           MTT cell viability assay (Solarbio) was used to analyze cell viability according to the  
3 manufacturer's instructions. Briefly, 10 µl MTT (0.5%) mixed with 90 µl fresh medium was added  
4 into the well. The cells were incubated at 37°C for 4 h, after the formazan crystals were formed,  
5 the medium was removed and 110 µl DMSO was used to solubilize the formazan crystals. The  
6 absorbance at 490 nm was measured with a multimode plate reader victory x5 (Perkin Elmer).

7

8   1     Luo, B. *et al.* Highly parallel identification of essential genes in cancer cells. *Proc Natl Acad*  
9 *Sci U S A* **105**, 20380-20385, doi:10.1073/pnas.0810485105 (2008).

10   2     <https://doi.org/10.14806/ej.17.1.200>

11   3     Langmead, B. & Salzberg, S. L. Fast gapped-read alignment with Bowtie 2. *Nat Methods* **9**,  
12 357-359, doi:10.1038/nmeth.1923 (2012).

13   4     Li, H. *et al.* The Sequence Alignment/Map format and SAMtools. *Bioinformatics* **25**, 2078-  
14 2079, doi:10.1093/bioinformatics/btp352 (2009).

15   5     Anderson, D. E. *et al.* Comparative Loss-of-Function Screens Reveal ABCE1 as an Essential  
16 Cellular Host Factor for Efficient Translation of Paramyxoviridae and Pneumoviridae. *mBio* **10**,  
17 doi:10.1128/mBio.00826-19 (2019).

18   6     Malo, N., Hanley, J. A., Cerquozzi, S., Pelletier, J. & Nadon, R. Statistical practice in high-  
19 throughput screening data analysis. *Nat Biotechnol* **24**, 167-175, doi:10.1038/nbt1186 (2006)

20   7     Reed, LJ, Muench, H. A simple method of estimating fifty percent endpoints. *Am. J. Hygiene*  
21 27: 493–497(1938).

# Figure 1

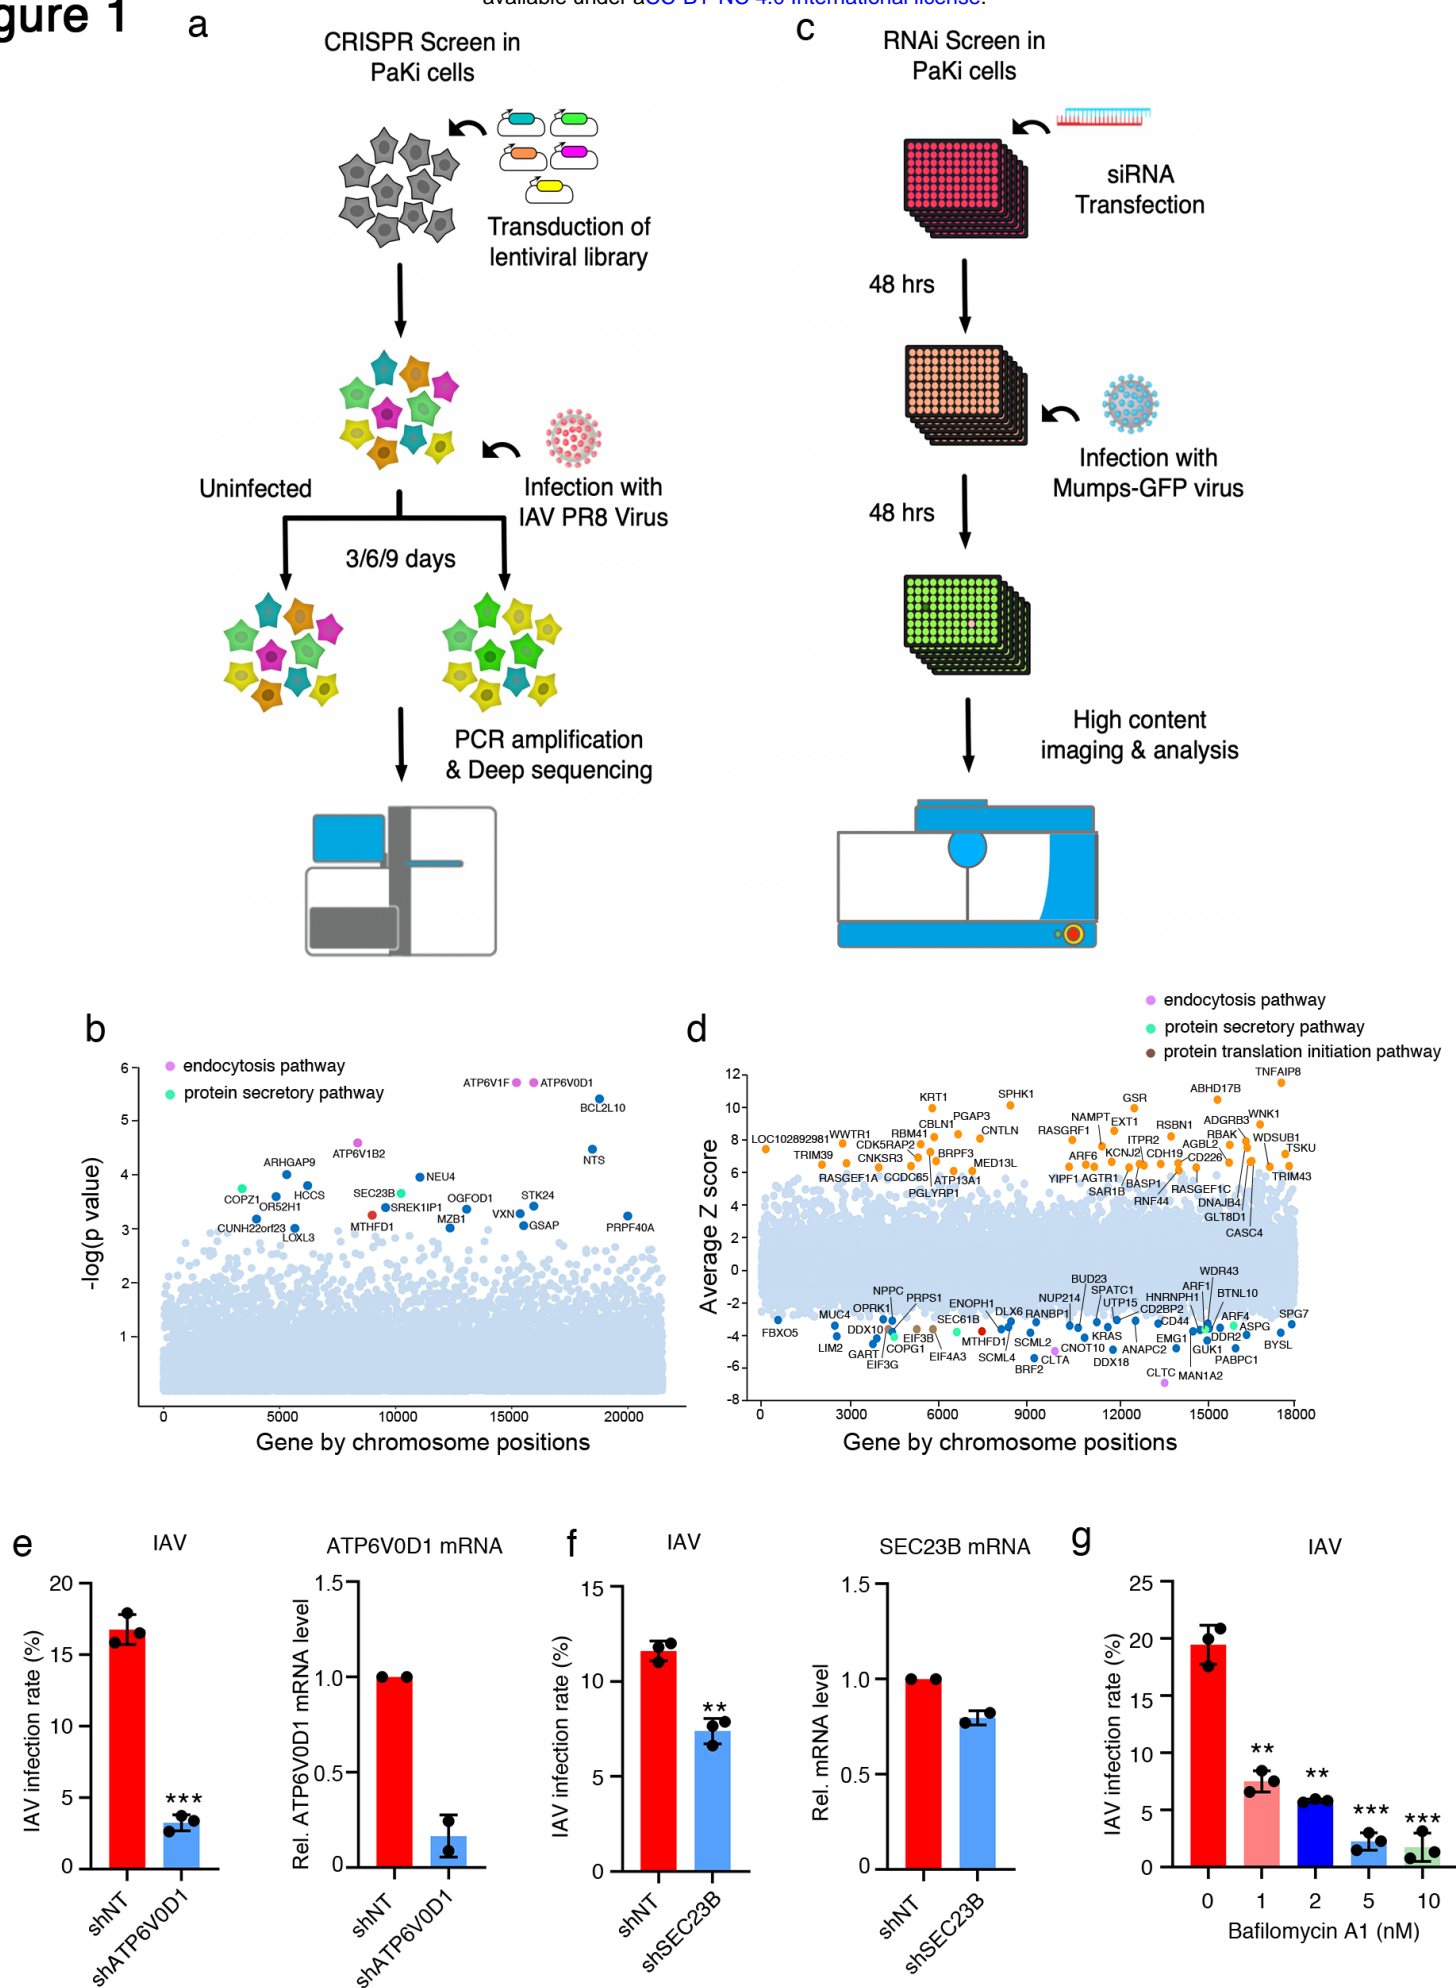

**Figure 2**

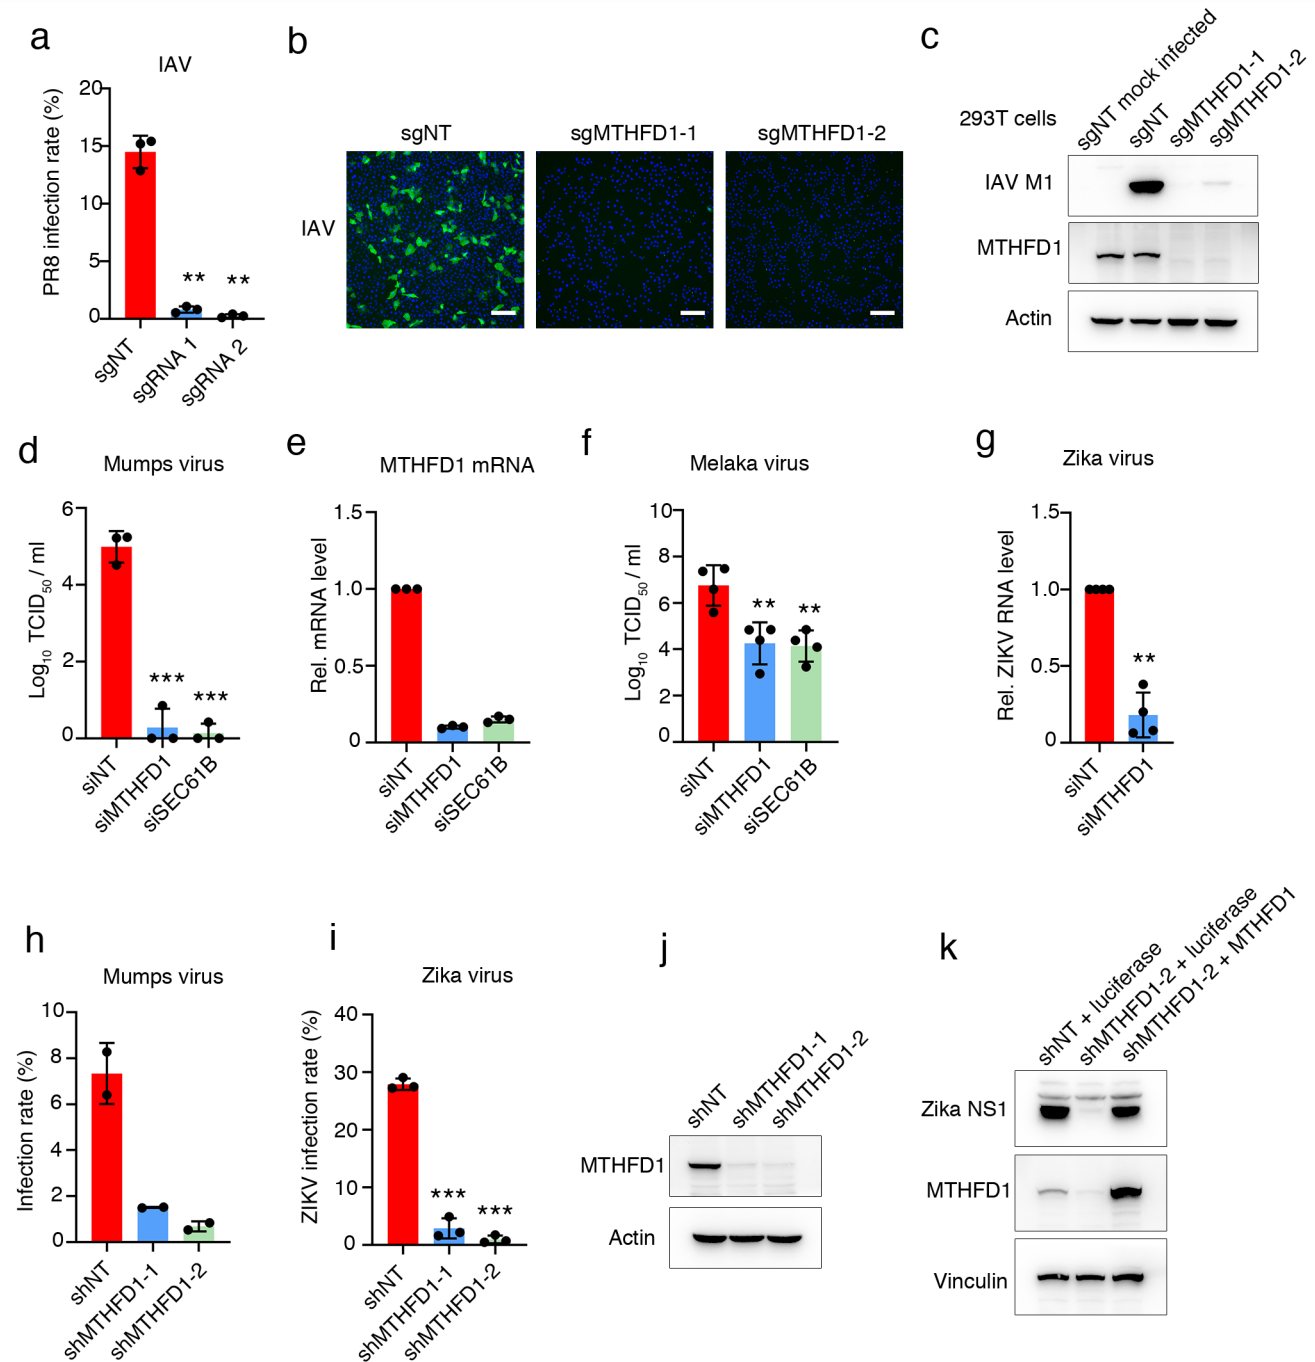

## Figure 3

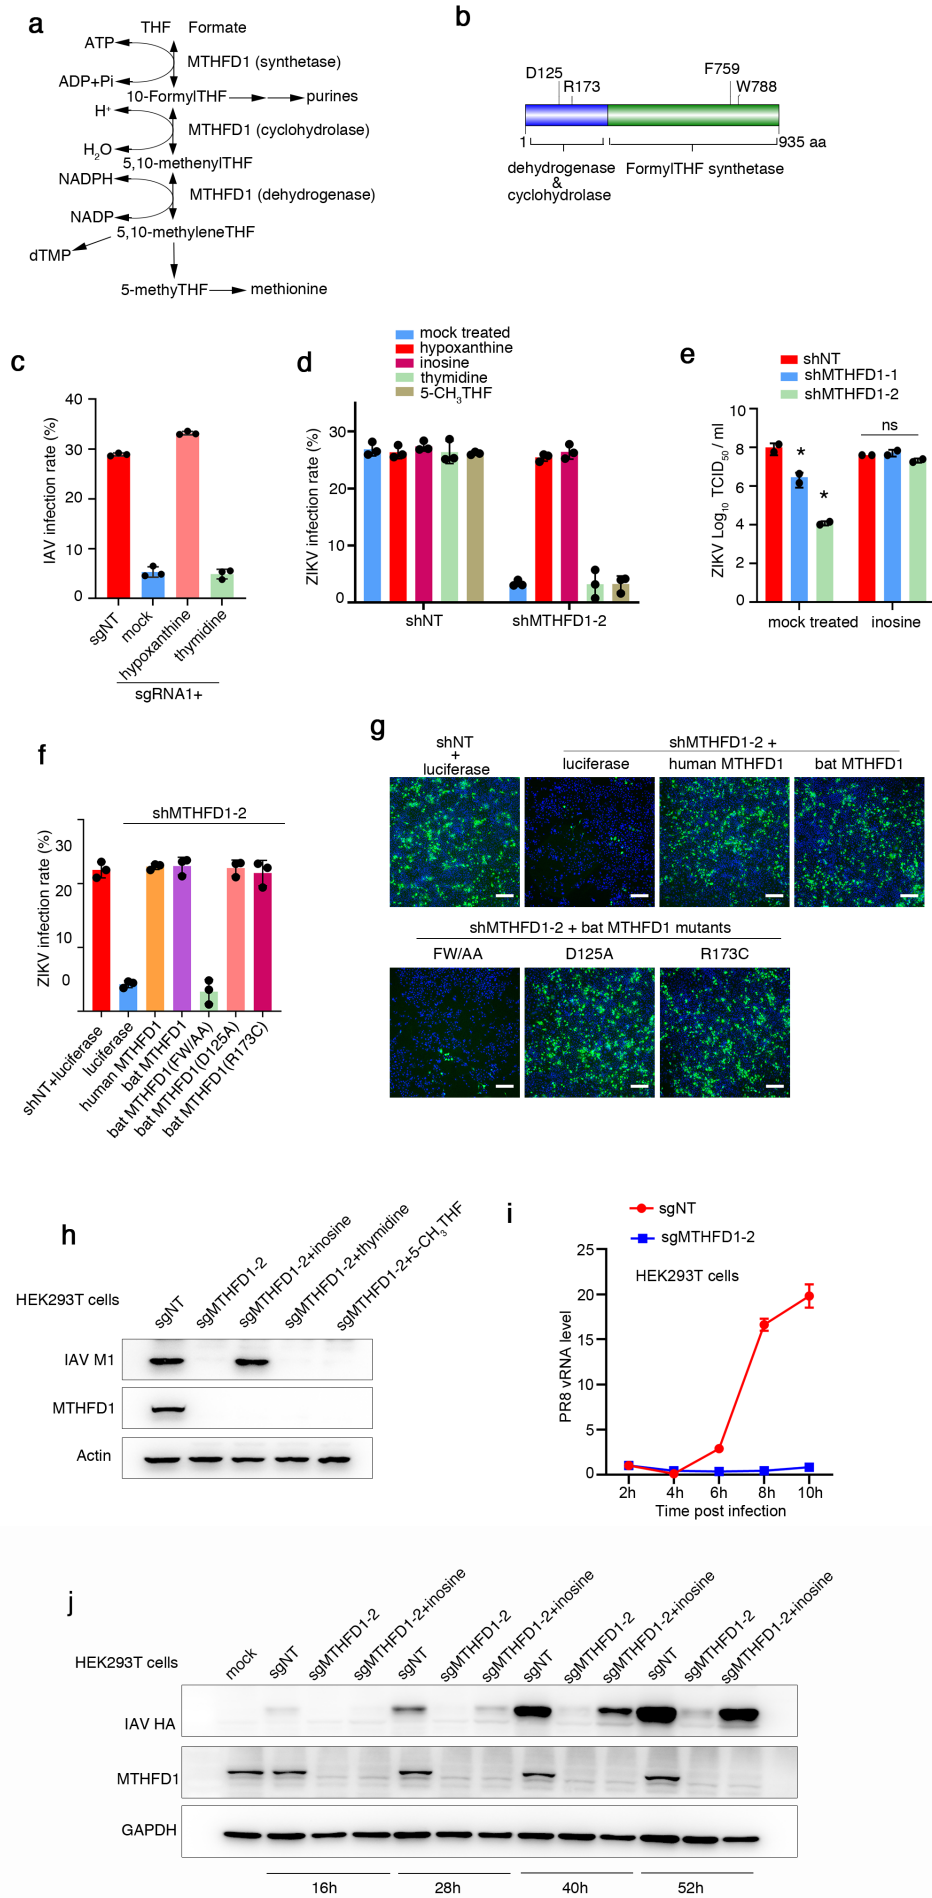

**Figure 4**

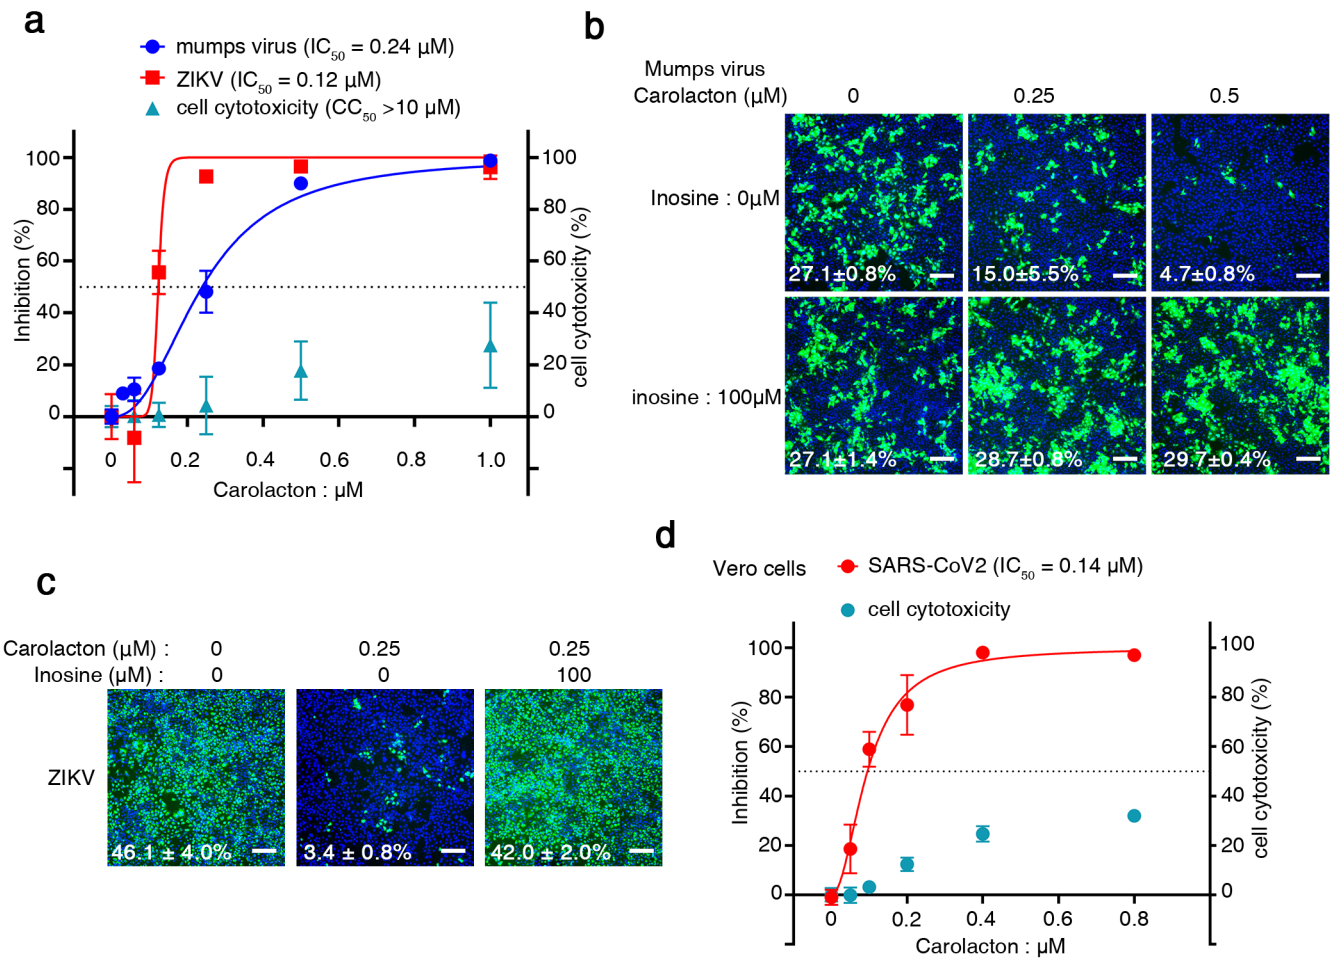

**a**

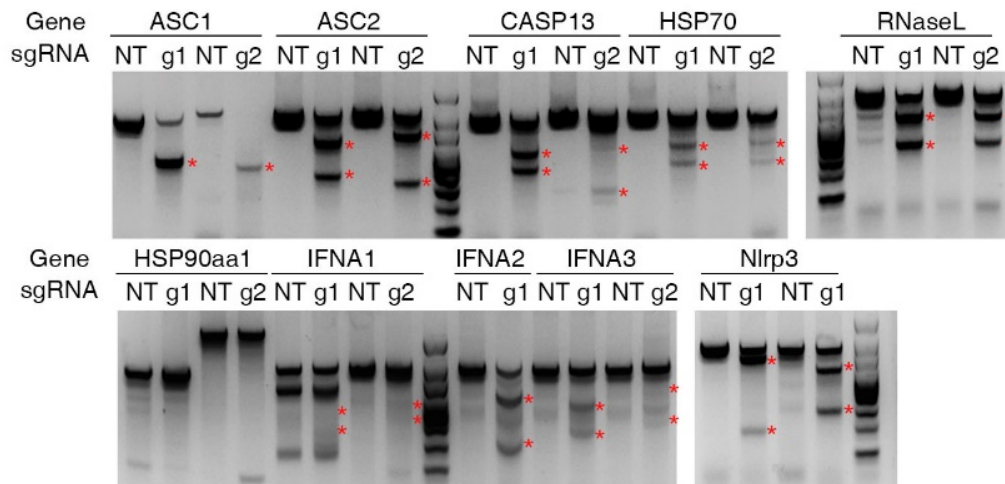

**b**

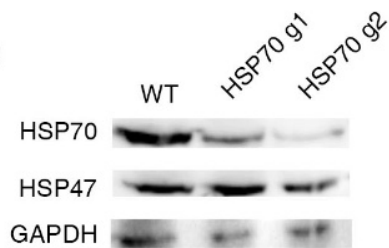

**Supplementary Figure 1. Validation of sgRNA design of ten genes in PaKi cell line using CRISPR-Cas9. a.** T7E1 assay to confirm indels in the target genes. NT: non-targeting control, g1,g2: designed guide RNA targeting each gene. **b.** Western blot to confirm the decrease of protein level of HSP70 by two guide RNAs g1 and g2.



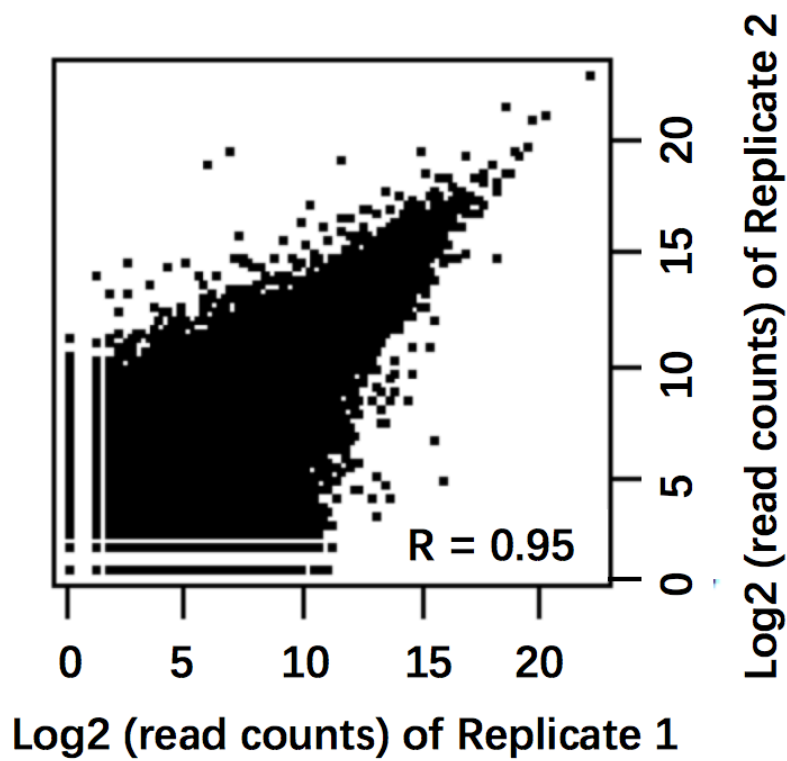

**Supplementary Figure 2. Correlation between the read counts of each sgRNA in two biological replicates of the CRISPR screen.**

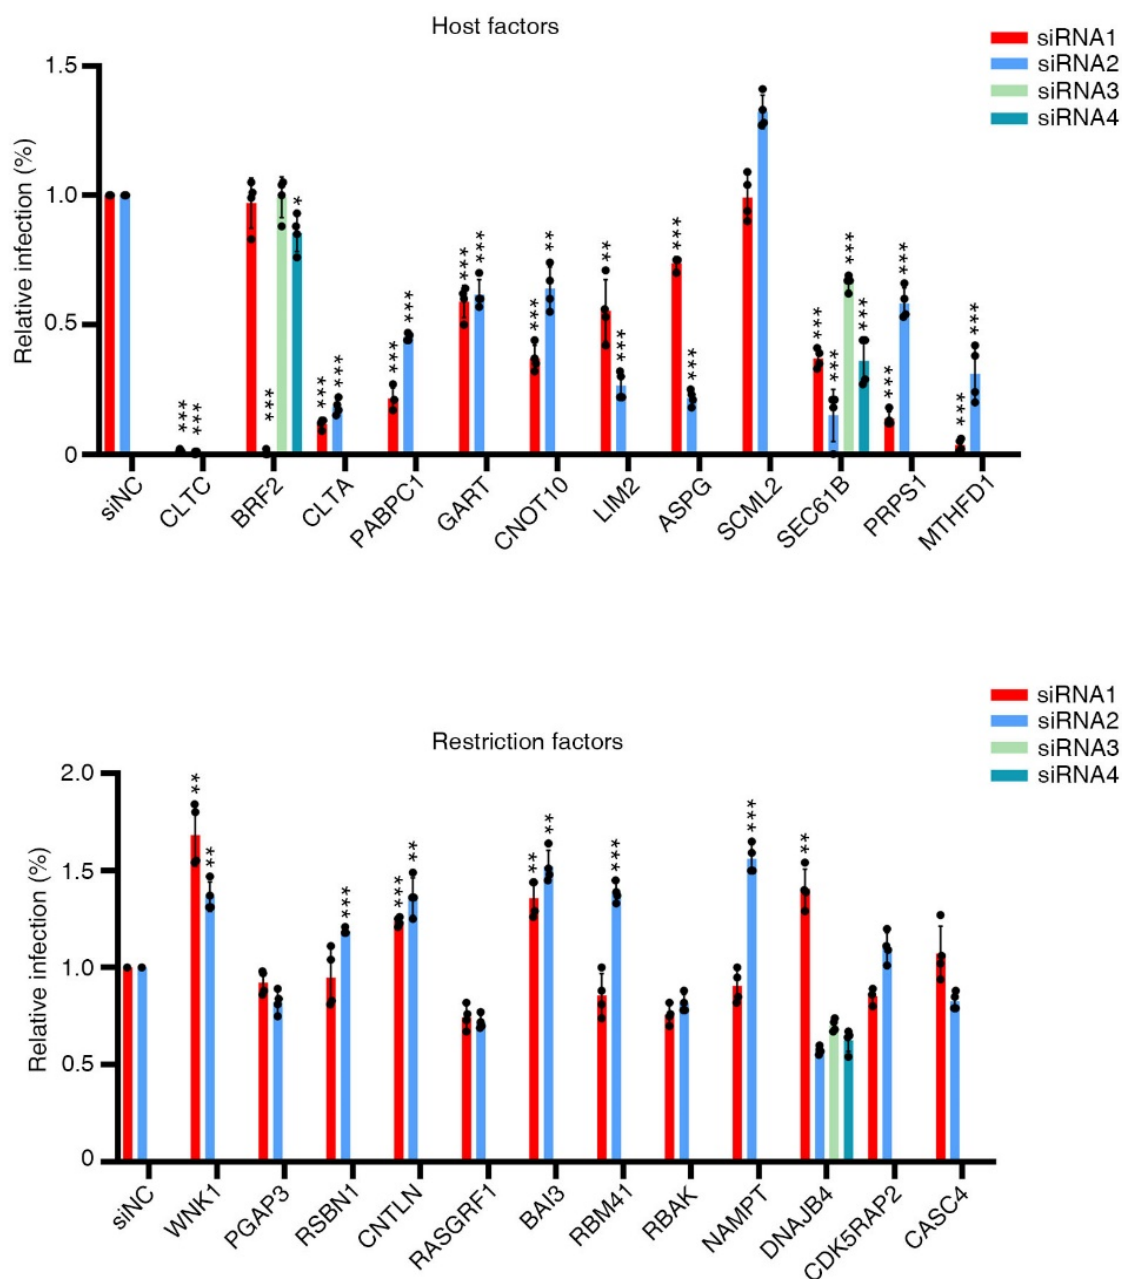

**Supplementary Figure 3. Validation of siRNA screen hits.** PaKi cells were transfected with the siRNAs followed by mumps-GFP virus infection. The virus infection levels were measured by high content imaging.

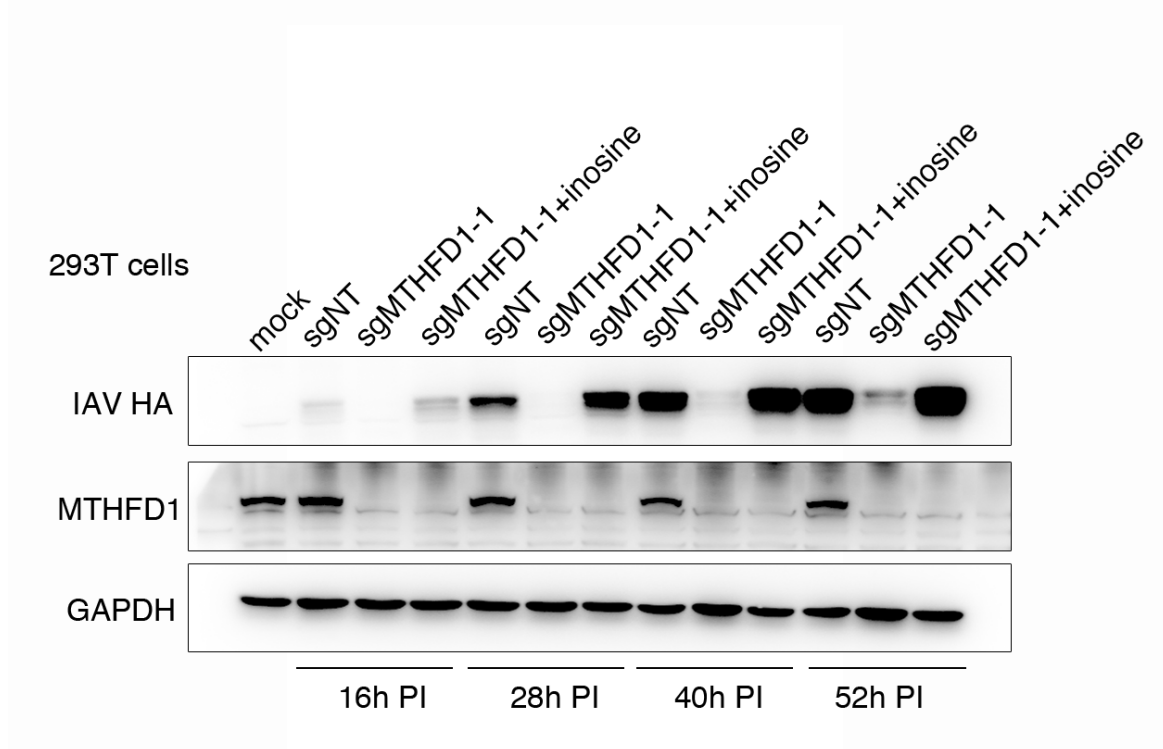

**Supplementary Figure 4. Supplementation of inosine rescues IAV replication in MTHFD1 knockout 293T cells.** MTHFD1 knockout cells (sgMTHFD1-1) were starved in the medium without HT for 8h and then infected with PR8 with or without inosine supplementation. At 16h, 28h, 40h and 52h post infection, the cells were collected and analyzed by Western blotting.

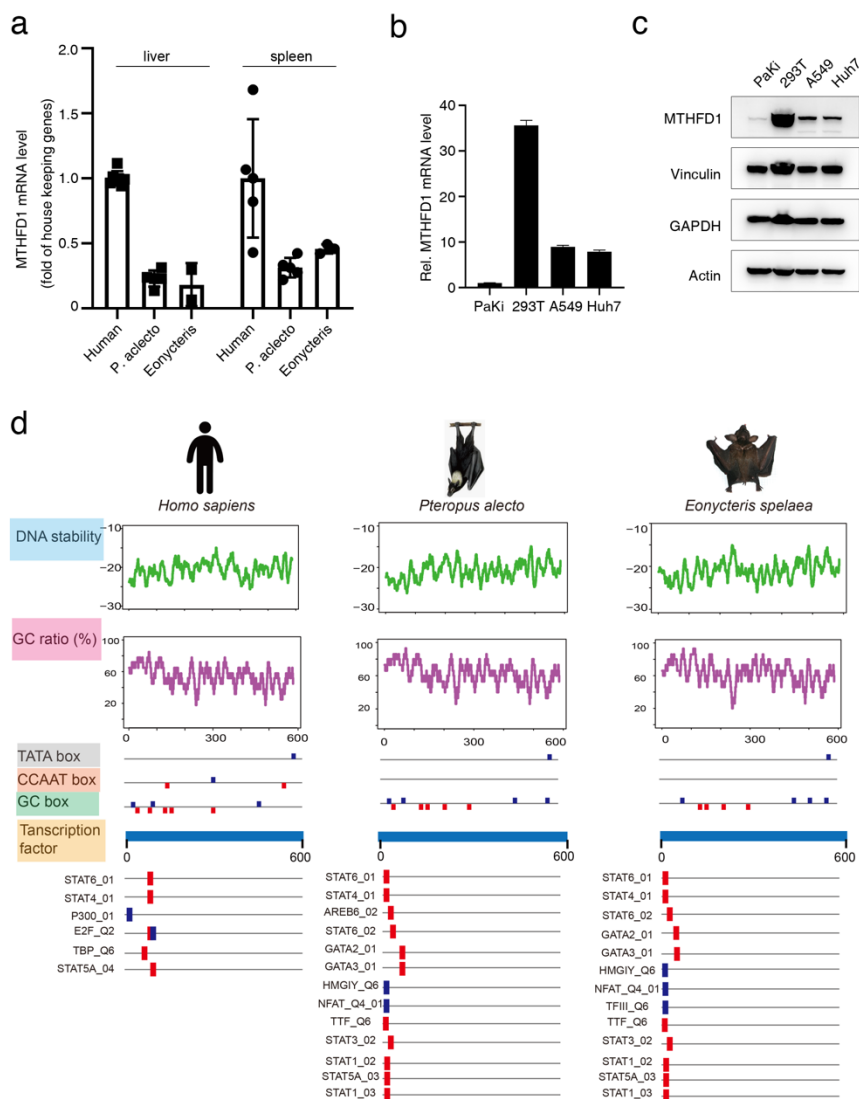

**Supplementary Figure 5. Bats have a lower MTHFD1 expression level compared humans.** **a.** livers and spleens of human and two bat species were applied to RNAseq, and MTHFD1 mRNA level was analyzed. **b.** MTHFD1 mRNA levels in difference cell lines were compared using qRT-PCR with GAPDH as a reference gene. **c.** MTHFD1 protein levels in different cell lines was compared by Western blotting. **d.** promoter analysis of MTHFD1 between human and two bat species (*P. alecto* and *E. spelaea*). The transcription factor binding sites and structure of promoters were characterized by the help of GPMiner (<http://gpminer.mbc.nctu.edu.tw/>) and the related information of the regulatory features such as transcription factor binding site (TFBS), G + C content, TATA box, CCAAT box, GC box and DNA stability are shown. Blue and red boxes indicate positions of those putative elements and related transcription factors predicted by GPMiner. A lack of CCAAT box was observed in both bats.
